1 **Identification of Dysregulated Pathways and key genes in Human Retinal Angiogenesis**  
2 **using Microarray Metadata**

3 Umadevi Subramanian<sup>1</sup> and Bharanidharan Devarajan<sup>1,\*</sup>

4 <sup>1</sup> Department of Bioinformatics, Aravind Medical Research Foundation, Madurai, India.

5 \*Corresponding authorE-mail: [bharanid@gmail.com](mailto:bharanid@gmail.com)

6  
7 **Abstract**

8 Retinal angiogenesis is a common neovascularization mechanism that causes severe  
9 irreversible vision loss in the number of retinal diseases worldwide. Patients often do not  
10 respond to the current anti-angiogenic therapies and have a vision loss. Understanding the  
11 various angiogenic pathways and factors involved in the pathogenic mechanism is vital for  
12 disease management. In this study, to identify dysregulated angiogenic pathways and  
13 specific angiogenic factors involved in vision-threatening diseases namely proliferative  
14 diabetic retinopathy (PDR), retinopathy of prematurity (ROP) and neovascular age-related  
15 macular degeneration (nAMD), we downloaded microarray metadata of samples and  
16 obtained the differentially expressed genes (DEGs) in all the disease and each disease  
17 samples compared to controls. Subsequently, we performed Gene Set Enrichment (GSEA)  
18 analysis for pathways, a protein-protein interaction (PPI), and angiome network analysis  
19 using R and Cytoscape software. We identified highly enriched dysregulated pathways that  
20 were neuroactive ligand receptor interaction and cytokine-cytokine receptor interaction.  
21 The angiogenic-associated DEGs were predominately related to the cytokine-cytokine  
22 receptor interaction pathway, which we further confirmed with RNA-seq data of PDR  
23 samples. Together, our analysis of these data elucidated the molecular mechanisms of  
24 retinal angiogenesis and provided potential angiogenic targets for therapeutics.

25  
26 **Keywords:** Retinal angiogenesis, Microarray-Meta data, Dysregulated angiogenic  
27 pathways, Cytokine-cytokine receptor interaction pathway

## 33 **1. Introduction**

34 Retinal angiogenesis is the common dysregulated pathway of numerous blinding  
35 disorders, namely, proliferative diabetic retinopathy (PDR), retinal artery (or vein) occlusion,  
36 retinopathy of prematurity (ROP), sickle cell retinopathy<sup>1</sup>, and neovascular age-related  
37 macular degeneration (nAMD)<sup>2</sup>. Although there are subtle differences in the mechanism of  
38 angiogenesis, they are characterized as common neovascularization event. Angiogenesis is a  
39 physiological process through which new blood vessels formed from pre-existing vessels  
40 under hypoxic conditions<sup>3</sup>. Hypoxia-inducible-1 $\alpha$  drives the expression of substantial  
41 pro-angiogenic growth factors and induces endothelial cells into a tip cell phenotype. The tip  
42 cell proliferates slowly and activates matrix metalloproteinases (MMPs), plasmin, uPA, and  
43 tPA, and cleaving numerous extracellular matrix (ECM) proteins. The activated MMPs and  
44 other proteins stimulate the Notch ligand in tip cells and proliferate further to elongate a new  
45 vessel<sup>4,5</sup>. As the newly formed vessels mainly serve a role in a wound healing response, they  
46 usually do not restore tissue integrity, but instead, cause visual impairment<sup>6,7</sup>.

47 Vascular endothelial growth factor (VEGF) is the major growth factor, induced in  
48 hypoxic conditions. VEGF family members VEGF-A, VEGF-B, VEGF-C, VEGF-D and  
49 placental growth factor (PlGF), and their receptors are the validated regulators of angiogenic  
50 signaling pathway<sup>8</sup>. VEGF-A is the potent growth factor and mediator of intraocular  
51 neovascularization. VEGF-A stimulates not only the development of new blood vessels, but  
52 also, microaneurysm formation, capillary occlusion with ischemia, and promoting increased  
53 vascular permeability<sup>9</sup>. VEGF-B can regulate the function of endothelial cells. VEGF-C and  
54 VEGF-D increase vascular permeability as well as induce angiogenesis. PlGF plays a role in  
55 pathogenic angiogenesis by increasing the activity of VEGF-A<sup>10</sup>.

56 The current anti-angiogenic agents, approved by the Food and Drug Administration,  
57 inhibit the VEGF pathway<sup>8</sup>. The anti-VEGF drugs are the molecules that target VEGF  
58 isoforms, or inhibiting VEGF receptors, or inhibiting VEGF downstream signaling<sup>11</sup>. About  
59 30% of PDR patients fail to respond to initial treatment, and the majority of the responders  
60 would require multiple rounds of intravitreal injections<sup>12</sup>. Therefore, anti-VEGF treatment is  
61 potentially required for years, and chronic VEGF inhibition may cause side effects and drug  
62 resistance. The potential consequence of VEGF blockade is hypertension, proteinuria,  
63 impairment of wound healing/collateral vessel development, and inhibition of bone growth,  
64 infertility, inhibition of skeletal muscle, regeneration, cardiac remodeling and  
65 neuroprotective effect in the ischaemic retina<sup>13</sup>. Also, a dose-dependent decrease in ganglion  
66 cells was reported in rats<sup>14</sup>.

67 Studies show that VEGF independent factors may stimulate angiogenesis, particularly in  
68 tumors<sup>15</sup>. Zhang et al. suggested identifying the angiogenic factors other than VEGF for a  
69 better therapeutic approach<sup>16</sup>. Gene expression studies have been widely performed to  
70 identify angiogenic factors. However, such studies will provide numerous key genes that are  
71 differentially expressed, and thus, it is a challenging task to detect reliable targets. On the  
72 molecular level, a combination of the differential gene expression (which may vary in each  
73 individual) is assumed to dysregulate the common cellular pathway<sup>17</sup>. Therefore,  
74 identification of the dysregulated pathways is essential for understanding disease  
75 mechanisms and the identification of targets for future application of custom therapeutic  
76 decisions<sup>18</sup>. The accumulation of large amounts of gene expression data in public databases  
77 provides an opportunity for identifying commonly dysregulated pathways and the gene  
78 targets that are differentially expressed<sup>19</sup>.

79 In the present study, we aim to identify the dysregulated angiogenic pathways in addition  
80 to VEGF dependent angiogenic pathway in retinal diseases. To achieve our aim, we designed  
81 this study with several steps that are (i) to combine the microarray data from different reliable  
82 experiments and adjusting batch effects, (ii) to identify robust differentially expressed genes  
83 (DEGs), (iii) to conduct the pathway enrichment analysis, (iv) to identify key dysregulated  
84 angiogenic pathways and angiogenic factors through network analysis and (v) to compare  
85 and confirm the identified dysregulated angiogenic pathways and angiogenic factors with  
86 available RNA-Seq data

## 87 **2. Materials and Methods**

### 88 2.1. Gene expression data and preprocessing

89 All the microarray samples used in this study were systematically searched and  
90 downloaded from NCBI-GEO<sup>20</sup> after the manual curation of the sample details. Probe IDs  
91 were mapped to official gene symbols in the DAVID database<sup>21</sup>, and non-protein coding  
92 genes, as defined by an assignment of HUGO gene symbol, were excluded from the study. In  
93 case of genes with multiple probes, gene expression level was aggregated from probeset to  
94 gene-level data by taking the maximum value across all the samples<sup>22</sup>.

### 95 2.2. Missing value imputation and normalization of data

96 All the samples selected for the study were combined by their gene symbol using R  
97 script. The missing gene expression values were imputed by Bayesian Principal Component  
98 Analysis (BPCA) method<sup>23</sup>, which performed well even with low entropy. Further, the whole  
99 data were quantile normalized<sup>24</sup> to make the distribution of values in all the samples into the

100 same. The outlier samples were removed based on the principal component analysis (PCA)  
101 plot. Further it was confirmed with Euclidean distance-based clustering using R script.

### 102 2.3. Identification of differentially expressed genes (DEGs) and pathway enrichment

103 DEGs were selected from the list by filtering, only if the moderated t-test FDR was  $\leq$   
104 0.05 and the fold change (FC - a difference of the means between two groups when all the  
105 values were log<sub>2</sub> transformed)  $\geq 2$  (up-regulated) or  $\leq -2$  (down-regulated). For the pathway  
106 analysis, Gene Set Enrichment Analysis (GSEA) proposed by Subramanian et al.  
107 implemented with GenePattern tools was performed<sup>25</sup>. The DEGs and FC values were  
108 regarded as a pre-ranked list, and c2.cp.kegg.v6.1 was interrogated as pathway database. We  
109 used default parameters and set the minimum gene set size 2. The output enrichment score  
110 reflects the degree to which a gene set in the pathway is over-represented at the extreme (low  
111 or high) of the entire ranked list of FC. For the pathway enrichment, normalized enrichment  
112 score (NES) was considered as a metric of influence of DEGs with p-value  $\leq 0.05$ .

113 Analysis was carried out with different perspectives, differential gene expression and  
114 pathway regulation between retinal angiogenesis (case) samples and controls, case and tissue  
115 (retina, and RPE/C) specific controls, cases and disease (dry AMD, non-Proliferative  
116 Diabetic Retinopathy - NPDR, and Diabetic Mellitus - DM) specific control samples, disease  
117 specificity (nAMD, PDR, ROP) and control samples as given in figure 1. Among the DEGs,  
118 the angiogenesis-related genes were identified by GO term in GSEA and the list is given by  
119 Chu et al.<sup>26</sup>. Further, the STRING database was used to retrieve the predicted interactions for  
120 the identified DEGs and graphically represented using Cytoscape 3.2.0.

### 121 2.4. RNA-Seq analysis

122 The available RNA-Seq samples related to this study in NCBI-SRA are PDR (Accession  
123 No.: SRP097696) and whole retinal (SRP119766) control samples. They were downloaded  
124 by SRA Toolkit, aligned to human reference genome hg38 using CLC Genomics Workbench  
125 12.0, quantile normalized in R, and analyzed using EdgeR.

## 126 3. Results

### 127 3.1. Standardization of gene expression data

128 The analysis was primarily done with 243 control samples, 95 normal retinal control  
129 (GSE60436 (3 samples), GSE28133 (19), GSE29801 (55), GSE32614 (12), GSE41019 (3),  
130 GSE57864 (3)), 138 normal RPE/C control (GSE18811 (31), GSE29801 (96), GSE43257  
131 (2), GSE50195 (7), GSE5741 (2)), and 32 disease cases includes, 16 (8 retina, and 8 RPE/C)  
132 nAMD (Accession No.: GSE29801), 6 fibrovascular membrane of PDR (GSE60436), and 10  
133 retinal microvascular endothelial cells of ROP (GSE5946) samples. The studies with disease

134 specific control samples include, 64 dry AMD retina (GSE29801 (61), GSE17938 (3)), 9 dry  
135 AMD RPE/C (GSE50195), 6 neural retinal NPDR (GSE53257) and 6 neural retinal DM  
136 (GSE53257) samples. After preprocessing and merging of data, 15.75% of missing data were  
137 imputed. All the samples which contain 18621 genes were quantile normalized (Figure S1).  
138 The 318 control samples (95 retina, 138 RPE/C) used in the primary study were obtained  
139 from different technical platforms. Eventhough they were quantile normalized, to reduce the  
140 bias the outlier samples have to be removed. In order to this, all the disease samples and  
141 control samples were subjected to PCA (Figure S2). The disease samples were retained, the  
142 control samples which were scatterd/ outgrouped were removed, and clustering tree was  
143 construted with remaining samples. This process was iteratively done once observed the  
144 clear clustering of case and control samples (Figure S3). This results to 31 retina and 34  
145 RPE/C control samples.

### 146 3.2. Dysregulated pathways of all the cases with all normal control samples

147 One thousand three hundred eighty-three genes displayed differential expression with  
148 two-fold change ( $FDR \leq 0.05$ ) in all the cases compared to normal control samples (Figure  
149 S4). Of these, 852 were downregulated and 531 upregulated. Gene set enrichment analysis  
150 (GSEA) with respect to pathways showed that 237 DEGs were associated with 22 different  
151 dysregulated pathways (significant with  $p \leq 0.05$ , NES of pathways are given in Table 1). We  
152 then analyzed DEGs that are associated with angiogenesis. We identified 127  
153 angiogenic-associated enriched DEGs, of which 31 were based on gene ontology (GO)  
154 (NES: 1.74 with  $p = 0.01$ ) and 96 DEGs were based on the literature. The highly enriched  
155 pathways with their significantly altered DEGs and their association with angiogenesis were  
156 graphically represented in Figure 2.

157 The neuroactive ligand receptor interaction pathway was the highly dysregulated  
158 pathway with the normalized enrichment score (NES) of 3.15, and 15 DEGs were identified  
159 in this pathway. Of these, 11 DEGs were unique to this pathway and while, 4 DEGs GRIN1,  
160 CHRM2, GRIN2C and GRIN2D were connecting other pathways. Only UTS2R was found  
161 to be angiogenic-associated (Figure 2).

#### 162 3.2.2. Cytokine-cytokine receptor interaction pathway

163 Cytokine-cytokine receptor interaction pathway, next to the neuroactive ligand receptor  
164 interaction pathway, had enrichment score 2.55 (Table 1). We identified 25 DEGs (Figure 2  
165 and S5) in this pathway. Among these, down-regulated VEGFA, CCL3, EGFR, PDGFC and  
166 up-regulated genes VEGFB, VEGFC, CX3CL1, ACVRL1, CCL23, CCL24, CCL26, OSM,  
167 and TNFRSF25 genes were found to be angiogenic-associated. Of interest, we identified that

168 three of the angiogenic-associated genes PDGFC, CXCL1, and EGFR were also involved in  
169 the other pathways, as shown in Figures 2 and S5.

### 170 3.2.3. Other pathways with DEGs of angiogenic association

171 In addition to highly enriched cytokine-cytokine receptor interaction and Neuroactive  
172 ligand receptor interaction pathways, we showed 13 other pathways with  
173 angiogenic-associated DEGs. Regulation of the actin cytoskeleton pathway has ten  
174 angiogenic DEGs; Adherens junction and Epithelial cell signaling in *Helicobacter pylori*  
175 infection have seven angiogenic DEGs; tight junction has six angiogenic DEGs. Three  
176 angiogenic DEGs were involved in Alzheimer's disease and arrhythmogenic right ventricular  
177 cardiomyopathy ARVC pathways and 2 DEGs were in endocytosis and pathogenic  
178 *Escherichia coli* infection pathways. Five pathways had one DEG, namely, aminoacyl tRNA  
179 biosynthesis (YARS), Huntington's disease (BAX), p53 signaling pathway (BAX), ribosome  
180 (RPL29) and *Vibrio cholerae* infection (GNAS).

181 The angiogenic-associated DEGs that were involved in two enriched pathways include  
182 ADAM10, BAX, CXCL1, ITGAV, JAM3, NRAS, and PDGFC. CTNNA1, MAPK1, and  
183 RAC1 were involved in three enriched pathways; RHOA in four pathways; EGFR and  
184 CDC42 were involved in more than five pathways. Despite the above, 92  
185 angiogenic-associated DEGs were not involved in any of the enriched pathways. For  
186 instance, we identified the SEMA3B gene with high fold change of 5.154 and not involved in  
187 any of the enriched pathways.

### 188 3.2.4. Angiogenic interactome of DEGs through protein-protein interaction (PPI)

189 In order to identify the interactome of angiogenic-associated DEGs, their protein-protein  
190 interaction (PPI) partners and pathways associated with them are connected as network and  
191 graphically illustrated in Figure 3. PPP2CA showed the highest connectivity, which is  
192 associated with the tight junction pathway, and it mostly connected to the ribosome pathway.  
193 Followed by PPP2CA, RHOA and EGFR showed more interacting partners and pathways.

### 194 3.2.5 Pathway specificity analysis

195 To examine the specificity of enriched pathways (Table 1), we performed a similar  
196 analysis using two sets of control samples, one from the retina and one from RPE/Choroid  
197 samples (Figure 1). Compare to enriched pathways obtained using all control samples; we  
198 identified that almost all the enriched pathways were enriched either using retina or  
199 RPE/Choroid or both except Cysteine and methionine metabolism and *Vibrio cholerae*  
200 infection. However, there are other pathways were enriched in the two control data sets that  
201 were not enriched in all control data as shown in Supplementary Table S1. Nevertheless, the



202 enriched pathways, as shown in Table 1 is not affected by the two different retina and  
203 RPE/Choroid control data sets, not random, although they influence the pathway enrichment  
204 analysis.

### 205 3.2.6 Disease-specific analysis

206 Furthermore, we performed disease-specific pathway enrichment analysis whether a  
207 single disease influences the angiogenic-associated pathways and genes. The heatmap of the  
208 dysregulated pathways with respect to disease specificity is illustrated in Figure 4. The highly  
209 enriched pathways Neuroactive ligand receptor interaction pathway and cytokine-cytokine  
210 receptor interaction pathway was not affected by the specific disease. The cytokine-cytokine  
211 receptor interaction pathway with highly angiogenic-associated DEGs was graphically  
212 illustrated as a heat map in Figure 5. Many angiogenic-associated genes (mentioned  
213 previously) showed similar patterns of fold change in all three retinal diseases. For example,  
214 VEGFA gene was downregulated in three all retinal diseases individually and all three  
215 together. We also performed the disease-specific comparative analysis using different  
216 control data set (Supplementary Table S2). When PDR samples compared with NPDR and  
217 DM samples, we observed the almost same pattern of dysregulated pathways. However, we  
218 did not observe similar pattern when we compared dry AMD with AMD samples.

### 219 3.3. Pathway analysis using RNA-seq data

220 We further extended our analysis with the RNA-sequencing data set in order to show  
221 whether the pathway enrichment analysis is biased with microarray data. We compared nine  
222 PDR samples with 13 normal whole retina samples, and we identified 5816 upregulated and  
223 2031 downregulated genes. The supplementary table 3 shows the dysregulated pathways  
224 with the NES score. The graft versus host disease pathway was enriched with the highest  
225 NES (4.15); however, it did not include the angiogenic DEGs. As expected, the  
226 Cytokine-cytokine receptor interaction pathway with NES of 3.35 is the most dysregulated in  
227 the retinal angiogenesis included with seventeen angiogenic-associated DEG. Among the  
228 DEGs, ACVRL1, CCL19, CCL23, CXCL1, IL10RA, IL18RAP, IL1R2, IL3RA, IL4R,  
229 OSM, TNFRSF25 and TNFRSF4 were observed with similar expression as that of the results  
230 from microarray data analysis. Notably, of the VEGF family, only VEGFC was observed  
231 with significant upregulation with 1.3 fold change.

## 232 4. Discussion

233 Neovascularization by dysregulation of angiogenic pathways is the major cause of vision  
234 loss in many retinal diseases. The purpose of this study is to identify dysregulated angiogenic  
235 pathways in addition to VEGF dependent angiogenic pathways and specific angiogenic

236 factors involved in vision-threatening retinal diseases, include PDR, ROP and nAMD. We  
237 thought that the most feasible approach to this end would be to combine all the expression  
238 data from retinal diseases with angiogenesis, to identify common dysregulated angiogenic  
239 pathways. We showed that VEGF independent pathways are highly enriched by the  
240 differentially expressed genes (DEGs) of the retinal angiogenesis samples. The two highly  
241 enriched pathways are neuroactive ligand receptor interaction and cytokine-cytokine  
242 receptor interaction pathways (Figure 4). Among the several DEGs involved in neuroactive  
243 ligand receptor interaction pathway, though our angiome-network showed no  
244 angiogenic-associated genes, ADRA1B<sup>27</sup>, CHRM2<sup>28</sup>, DRD4<sup>29</sup>, GALR3<sup>30</sup>, GLP2R<sup>31</sup>,  
245 GRIN2C<sup>32</sup>, GRIN2D<sup>33</sup>, HTR5A<sup>34</sup>, P2RY2<sup>35</sup>, UTS2R<sup>36</sup> DEGs have been reported to be  
246 involved in angiogenesis. The neuroactive ligand receptor interaction pathway has been  
247 reported to be the most significant pathway for cancers and angiogenesis and is also closely  
248 connected with the poor prognosis of cancer<sup>37-41</sup>.

249 Based on the angiome-network with enriched DEGs, we report that the  
250 cytokine-cytokine receptor interaction pathway is the highly dysregulated angiogenic  
251 pathway enriched with fifteen angiogenic-associated DEGs (Supplementary Figure S5)  
252 followed by regulation of actin cytoskeleton, adherens junction and epithelial cell signaling  
253 in *Helicobacter pylori* infection. Jennifer et al.<sup>42</sup> experimentally identified novel  
254 VEGF-independent cytokines and their association with PDR, suggesting the association of  
255 cytokines in angiogenesis. In this study, we have shown that ten angiogenic-associated  
256 cytokines were significantly up-regulated in the dysregulated cytokine-cytokine receptor  
257 interaction pathway. Interestingly, VEGFA along with other angiogenic factors CCL3,  
258 EGFR and PDGFC are significantly down-regulated, suggesting that VEGF independent  
259 cytokines play a vital role in retinal angiogenesis. Apart from the ten up-regulated  
260 angiogenic-associated genes, with widespread literature survey, we account that CCL19<sup>43</sup>,  
261 IL18RAP<sup>44</sup>, IL1R2<sup>45</sup>, LTB<sup>46</sup>, IL10RA<sup>47</sup>, CNTF<sup>48</sup> up-regulated genes may contribute to the  
262 dysregulation of angiogenesis. Therefore, we report that cytokine-cytokine receptor  
263 interaction pathway is the common dysregulated pathway in retinal angiogenesis as  
264 previously stated in the animal models of retinal angiogenesis<sup>49</sup>.

265 Of interest, to support that cytokine-cytokine receptor interaction pathway as common  
266 dysregulated angiogenic pathways in retinal diseases, we constructed a regulatory pathway  
267 (figure 6) with observed DEGs in this pathway and literature support. First, we exhibit that  
268 the VEGF pathway is downregulated by showing the downregulation of VEGFA gene  
269 expression (Figures 5 and 6) and upregulation of CCL19 with CCR7 in retinal angiogenesis.



270 The CCL19 and CCR7 have been reported to regulate the VEGF pathway negatively<sup>50-52</sup>.  
271 Additionally, the DEGs CCL3<sup>53</sup> and EGFR<sup>54</sup> are reported to induce VEGFA expression,  
272 which is downregulated in this study. We observe the downregulation of other DEGs c-Met,  
273 RAS, ERK, Elk1 and STAT3 that could affect the VEGFA dependent angiogenesis<sup>52</sup>. The  
274 upregulated DEGs ITFRSF25, TNFRSF4, CCL23, CCL26, and CX3CL1 of  
275 cytokine-cytokine interaction pathway is reportedly activating PI3K/AKT pathway<sup>55-59</sup>,  
276 which in turn induces the angiogenesis through activating mTOR<sup>54</sup> and NFkB pathway<sup>60</sup>.  
277 The upregulated DEGs IL18RAP and CXCL1 has shown to modulates the NFkB and thus  
278 induces the angiogenesis. Furthermore, the upregulated DEG ACVRL1 is reported to  
279 promote endothelial cell proliferation by activating SMAD1<sup>61</sup> and coexpression of IL12 with  
280 CCL19 reported to regulates the JAK/STAT signaling<sup>62</sup>, may help to mediate the  
281 angiogenesis indirectly<sup>61-63</sup>. We also observe that the other dysregulated pathways (Table 1)  
282 include aminoacyl tRNA biosynthesis, pathogenic Escherichia coli infection signaling,  
283 epithelial cell signaling in Helicobacter pylori infection and cysteine and methionine  
284 metabolism pathway, reported to trigger VEGF dependent angiogenic pathway<sup>64-66</sup>, are  
285 negatively enriched. We also support the fact that VEGF-independent angiogenic pathway in  
286 retinal angiogenesis using the PPI network. Most of the PPI partners of VEGFA namely  
287 EGF, FLT1, HIF1A, IGF1, KDR, PIK3CA, TGFB1, THBS1 are downregulated in this study.  
288 However, we have observed that the upregulation of VEGFB and VEGFC. However,  
289 comparing the expression VEGFB and VEGFC in each disease and results of RNA-seq  
290 analysis, we have identified that VEGFC expression is consistent, individually significant  
291 upregulation was observed in PDR (more than two FC).

292 Further, to identify the specific angiogenic factors that are related to the  
293 cytokine-cytokine receptor interaction pathway, we have examined the DEGs in the  
294 disease-specific data. The fold change pattern of DEGs related to cytokine-cytokine receptor  
295 interaction pathway is following the same pattern. However, among DEGs, CCL19, CCL26,  
296 CCL24, CXCL1, ACVRL1, OSM, IL4R, CCL23 and IL18RAP are significantly upregulated  
297 genes; while, VEGFA, EGFR, and IFNGR2 are downregulated genes in all three retinal  
298 diseases. The DEGs CCL14, CNTF, CX3CL1, IL10RA, IL15RA, IL1R2, IL3RA, LTB,  
299 PDGFC, TNFRSF25 and TNFRSF4 are upregulated genes in any of two retinal diseases.  
300 Further, when we compared the results with DEGs of cytokine-cytokine receptor interaction  
301 pathway enriched using RNA-Seq data, we have observed more than twelve DEGs that have  
302 similar expression viz ACVRL1, CCL19, CCL23, CXCL1, IL10RA, IL18RAP, IL1R2,  
303 IL3RA, IL4R, OSM, TNFRSF25 and TNFRSF4, suggesting their role in angiogenesis

304 invariably. Furthermore, we have observed that CXCL1 is the major hub of upregulated  
305 DEGs based on the protein-protein interactions with the angiome-pathway network (figure  
306 3), and thus it would be a potential target. In addition to CXCL1, based their angiogenic role  
307 (Figure 6), the PPI network (figure 3) and the RNA-seq data results, we highlight that  
308 VEGFC, ACVRL1, CCL23, CX3CL1 and TNFRSF25 are the notable targets.

309 In conclusion, the cytokine-cytokine receptor interaction pathway is highlighted as the  
310 common contributor for the retinal angiogenesis in PDR, ROP and nAMD through  
311 microarray metadata analysis. Further, several DEGs in the cytokine-cytokine receptor  
312 interaction pathway are identified as potential angiogenic factors that may cause the retinal  
313 angiogenesis. However, as only a few studies have been published related to the highlighted  
314 VEGF-independent retinal angiogenic pathways and genes, we hope that this work will lead  
315 future investigations into mechanisms of retinal angiogenesis, as well as identification of  
316 potential drug target.

## 317 **References**

- 318 1. Aiello, L. M. Perspectives on diabetic retinopathy. *Am. J. Ophthalmol.* (2003).  
319 doi:10.1016/S0002-9394(03)00219-8
- 320 2. Das, A. & McGuire, P. G. Retinal and choroidal angiogenesis: Pathophysiology and  
321 strategies for inhibition. *Progress in Retinal and Eye Research* (2003).  
322 doi:10.1016/j.preteyeres.2003.08.001
- 323 3. Folkman, J., Watson, K., Ingber, D. & Hanahan, D. Induction of angiogenesis during  
324 the transition from hyperplasia to neoplasia. *Nature* (1989). doi:10.1038/339058a0
- 325 4. Dulak, J., Józkowicz, A. & Łoboda, A. *Angiogenesis and vascularisation: Cellular  
326 and molecular mechanisms in health and diseases. Angiogenesis and Vascularisation:  
327 Cellular and Molecular Mechanisms in Health and Diseases* (2013).  
328 doi:10.1007/978-3-7091-1428-5
- 329 5. Neve, A., Cantatore, F. P., Maruotti, N., Corrado, A. & Ribatti, D. Extracellular matrix  
330 modulates angiogenesis in physiological and pathological conditions. *BioMed  
331 Research International* (2014). doi:10.1155/2014/756078
- 332 6. Andreoli, C. M. & Miller, J. W. Anti-vascular endothelial growth factor therapy for  
333 ocular neovascular disease. *Current Opinion in Ophthalmology* (2007).

- 334 doi:10.1097/ICU.0b013e3282f0ca54
- 335 7. Schlingemann, R. O. & Witmer, A. N. Treatment of retinal diseases with VEGF  
336 antagonists. *Progress in Brain Research* (2009).  
337 doi:10.1016/S0079-6123(09)17517-9
- 338 8. Ferrara, N., Hillan, K. J., Gerber, H. P. & Novotny, W. Discovery and development of  
339 bevacizumab, an anti-VEGF antibody for treating cancer. *Nature Reviews Drug*  
340 *Discovery* (2004). doi:10.1038/nrd1381
- 341 9. Hoeben, A. *et al.* Vascular endothelial growth factor and angiogenesis.  
342 *Pharmacological Reviews* (2004). doi:10.1124/pr.56.4.3
- 343 10. Usui, Y. *et al.* Angiogenesis and Eye Disease. *Annu. Rev. Vis. Sci.* (2015).  
344 doi:10.1146/annurev-vision-082114-035439
- 345 11. Giet, M., Henkel, C., Schuchardt, M. & Tolle, M. Anti-VEGF Drugs in Eye Diseases:  
346 Local Therapy with Potential Systemic Effects. *Curr. Pharm. Des.* (2015).  
347 doi:10.2174/1381612821666150225120314
- 348 12. Mirshahi, A. *et al.* Bevacizumab-augmented retinal laser photocoagulation in  
349 proliferative diabetic retinopathy: A randomized double-masked clinical trial. *Eur. J.*  
350 *Ophthalmol.* (2008).
- 351 13. Simó, R. & Hernández, C. Intravitreal anti-VEGF for diabetic retinopathy: Hopes  
352 and fears for a new therapeutic strategy. *Diabetologia* (2008).  
353 doi:10.1007/s00125-008-0989-9
- 354 14. K., N. *et al.* Vascular endothelial growth factor-A is a survival factor for retinal  
355 neurons and a critical neuroprotectant during the adaptive response to ischemic injury.  
356 *American Journal of Pathology* (2007).
- 357 15. Bałan, B. J. & Słotwiński, R. VEGF and tumor angiogenesis. *Central-European*  
358 *Journal of Immunology* (2008).
- 359 16. Zhang, F. *et al.* VEGF-B is dispensable for blood vessel growth but critical for their  
360 survival, and VEGF-B targeting inhibits pathological angiogenesis. *Proc. Natl. Acad.*  
361 *Sci. U. S. A.* (2009). doi:10.1073/pnas.0813061106
- 362 17. Kim, Y. A., Wuchty, S. & Przytycka, T. M. Identifying causal genes and dysregulated

- 363 pathways in complex diseases. *PLoS Comput. Biol.* (2011).  
364 doi:10.1371/journal.pcbi.1001095
- 365 18. Ahn, T., Lee, E., Huh, N. & Park, T. Personalized identification of altered pathways in  
366 cancer using accumulated normal tissue data. in *Bioinformatics* (2014).  
367 doi:10.1093/bioinformatics/btu449
- 368 19. Liu, K. Q., Liu, Z. P., Hao, J. K., Chen, L. & Zhao, X. M. Identifying dysregulated  
369 pathways in cancers from pathway interaction networks. *BMC Bioinformatics* (2012).  
370 doi:10.1186/1471-2105-13-126
- 371 20. Barrett, T. *et al.* NCBI GEO: Archive for functional genomics data sets - Update.  
372 *Nucleic Acids Res.* (2013). doi:10.1093/nar/gks1193
- 373 21. Huang, D. W., Sherman, B. T. & Lempicki, R. A. Systematic and integrative analysis  
374 of large gene lists using DAVID bioinformatics resources. *Nat. Protoc.* (2009).  
375 doi:10.1038/nprot.2008.211
- 376 22. Galavotti, S. *et al.* The autophagy-associated factors DRAM1 and p62 regulate cell  
377 migration and invasion in glioblastoma stem cells. *Oncogene* (2013).  
378 doi:10.1038/onc.2012.111
- 379 23. Oba, S. *et al.* A Bayesian missing value estimation method for gene expression profile  
380 data. *Bioinformatics* (2003). doi:10.1093/bioinformatics/btg287
- 381 24. Bolstad, B. M., Irizarry, R. A., Åstrand, M. & Speed, T. P. A comparison of  
382 normalization methods for high density oligonucleotide array data based on variance  
383 and bias. *Bioinformatics* (2003). doi:10.1093/bioinformatics/19.2.185
- 384 25. Subramanian, A. *et al.* Gene set enrichment analysis: A knowledge-based approach  
385 for interpreting genome-wide expression profiles. *Proc. Natl. Acad. Sci. U. S. A.*  
386 (2005). doi:10.1073/pnas.0506580102
- 387 26. Chu, L. H., Rivera, C. G., Popel, A. S. & Bader, J. S. Constructing the angiome: A  
388 global angiogenesis protein interaction network. *Physiol. Genomics* (2012).  
389 doi:10.1152/physiolgenomics.00181.2011
- 390 27. Tressel, S. L. *et al.* Pharmacology, biodistribution, and efficacy of GPCR-based  
391 pepducins in disease models. *Methods in molecular biology (Clifton, N.J.)* (2011).

- 392 doi:10.1007/978-1-60761-919-2\_19
- 393 28. Pacini, L. *et al.* M2muscarinic receptors inhibit cell proliferation and migration in  
394 urothelial bladder cancer cells. *Cancer Biol. Ther.* (2014).  
395 doi:10.4161/15384047.2014.955740
- 396 29. Campa, D. *et al.* Polymorphisms of dopamine receptor/transporter genes and risk of  
397 non-small cell lung cancer. *Lung Cancer* (2007). doi:10.1016/j.lungcan.2006.11.007
- 398 30. Mansouri, S. *et al.* GalR3 activation promotes adult neural stem cell survival in  
399 response to a diabetic milieu. *J. Neurochem.* (2013). doi:10.1111/jnc.12396
- 400 31. Romero, G., Von Zastrow, M. & Friedman, P. A. Role of PDZ Proteins in Regulating  
401 Trafficking, Signaling, and Function of GPCRs. Means, Motif, and Opportunity. in  
402 *Advances in Pharmacology* (2011). doi:10.1016/B978-0-12-385952-5.00003-8
- 403 32. Shang, Y., Zhang, J. & Huang, E. J. HIPK2-mediated transcriptional control of  
404 NMDA receptor subunit expression regulates neuronal survival and cell death. *J.*  
405 *Neurosci.* (2018). doi:10.1523/JNEUROSCI.3577-17.2018
- 406 33. Ferguson, H. J. M. *et al.* Glutamate dependent NMDA receptor 2D is a novel  
407 angiogenic tumour endothelial marker in colorectal cancer. *Oncotarget* (2016).  
408 doi:10.18632/oncotarget.7812
- 409 34. Zamani, A. & Qu, Z. Serotonin activates angiogenic phosphorylation signaling in  
410 human endothelial cells. *FEBS Lett.* (2012). doi:10.1016/j.febslet.2012.05.047
- 411 35. Ding, M. *et al.* Enhancer RNA – P2RY2e induced by estrogen promotes malignant  
412 behaviors of bladder cancer. *Int. J. Biol. Sci.* (2018). doi:10.7150/ijbs.27151
- 413 36. Chu, L. H., Lee, E., Bader, J. S. & Popel, A. S. Angiogenesis interactome and time  
414 course microarray data reveal the distinct activation patterns in endothelial cells. *PLoS*  
415 *One* (2014). doi:10.1371/journal.pone.0110871
- 416 37. Huan, J. *et al.* Insights into significant pathways and gene interaction networks  
417 underlying breast cancer cell line MCF-7 treated with 17 $\beta$ -Estradiol (E2). *Gene*  
418 (2014). doi:10.1016/j.gene.2013.08.027
- 419 38. Wei, P., Tang, H. & Li, D. Insights into Pancreatic Cancer Etiology from Pathway  
420 Analysis of Genome-Wide Association Study Data. *PLoS One* (2012).

- 421 doi:10.1371/journal.pone.0046887
- 422 39. Myers, J. S., von Lersner, A. K. & Sang, Q. X. A. Proteomic upregulation of fatty acid  
423 synthase and fatty acid binding protein 5 and identification of cancer- and  
424 race-specific pathway associations in human prostate cancer tissues. *J. Cancer* (2016).  
425 doi:10.7150/jca.15860
- 426 40. Shi, Z. *et al.* Exploring the key genes and pathways of osteosarcoma with pulmonary  
427 metastasis using a gene expression microarray. *Mol. Med. Rep.* (2017).  
428 doi:10.3892/mmr.2017.7577
- 429 41. Wei, L., He, F., Zhang, W., Chen, W. & Yu, B. Bioinformatics analysis of microarray  
430 data to reveal the pathogenesis of diffuse intrinsic pontine glioma. *Biol. Res.* (2018).  
431 doi:10.1186/s40659-018-0175-6
- 432 42. Bromberg-White, J. L. *et al.* Identification of VEGF-independent cytokines in  
433 proliferative diabetic retinopathy vitreous. *Investig. Ophthalmol. Vis. Sci.* (2013).  
434 doi:10.1167/iovs.13-12518
- 435 43. Yan, X. J. *et al.* Identification of outcome-correlated cytokine clusters in chronic  
436 lymphocytic leukemia. *Blood* (2011). doi:10.1182/blood-2011-03-342436
- 437 44. Benevides, L. *et al.* IL17 promotes mammary tumor progression by changing the  
438 behavior of tumor cells and eliciting tumorigenic neutrophils recruitment. *Cancer Res.*  
439 (2015). doi:10.1158/0008-5472.CAN-15-0054
- 440 45. Mar, A. C. *et al.* Interleukin-1 receptor type 2 acts with c-Fos to enhance the  
441 expression of interleukin-6 and vascular endothelial growth factor A in colon cancer  
442 cells and induce angiogenesis. *J. Biol. Chem.* (2015). doi:10.1074/jbc.M115.644823
- 443 46. Wang, D. & DuBois, R. N. Measurement of Eicosanoids in Cancer Tissues. *Methods*  
444 *in Enzymology* (2007). doi:10.1016/S0076-6879(07)33002-4
- 445 47. Zadka, Ł. *et al.* The expression of IL10RA in colorectal cancer and its correlation with  
446 the proliferation index and the clinical stage of the disease. *Cytokine* (2018).  
447 doi:10.1016/j.cyto.2018.04.030
- 448 48. Li, R., Wen, R., Banzon, T., Maminishkis, A. & Miller, S. S. CNTF mediates  
449 neurotrophic factor secretion and fluid absorption in human retinal pigment



- 450 epithelium. *PLoS One* (2011). doi:10.1371/journal.pone.0023148
- 451 49. Recchia, F. M., Xu, L., Penn, J. S., Boone, B. & Dexheimer, P. J. Identification of  
452 genes and pathways involved in retinal neovascularization by microarray analysis of  
453 two animal models of retinal angiogenesis. *Investig. Ophthalmol. Vis. Sci.* (2010).  
454 doi:10.1167/iovs.09-4006
- 455 50. Matsumura, A. *et al.* HGF regulates VEGF expression via the c-Met receptor  
456 downstream pathways, PI3K/Akt, MAPK and STAT3, in CT26 murine cells. *Int. J.*  
457 *Oncol.* (2013). doi:10.3892/ijo.2012.1728
- 458 51. Ueda, M. & Saji, H. Radiolabeled probes targeting hypoxia-inducible factor-1-active  
459 tumor microenvironments. *Scientific World Journal* (2014).  
460 doi:10.1155/2014/165461
- 461 52. Xu, Z. *et al.* CCL19 suppresses angiogenesis through promoting miR-206 and  
462 inhibiting Met/ERK/Elk-1/HIF-1 $\alpha$ /VEGF-A pathway in colorectal cancer. *Cell Death*  
463 *Dis.* (2018). doi:10.1038/s41419-018-1010-2
- 464 53. Liao, Y. Y. *et al.* CCL3 promotes angiogenesis by dysregulation of miR-374b/  
465 VEGF-A axis in human osteosarcoma cells. *Oncotarget* (2016).  
466 doi:10.18632/oncotarget.6708
- 467 54. Karar, J. & Maity, A. PI3K/AKT/mTOR Pathway in Angiogenesis. *Front. Mol.*  
468 *Neurosci.* (2011). doi:10.3389/fnmol.2011.00051
- 469 55. Schreiber, T. H. & Podack, E. R. Immunobiology of TNFSF15 and TNFRSF25.  
470 *Immunol. Res.* (2013). doi:10.1007/s12026-013-8465-0
- 471 56. Song, J., So, T. & Croft, M. Activation of NF- $\kappa$ B1 by OX40 Contributes to  
472 Antigen-Driven T Cell Expansion and Survival. *J. Immunol.* (2008).  
473 doi:10.4049/jimmunol.180.11.7240
- 474 57. Jeong, W., Bae, H., Lim, W., Bazer, F. W. & Song, G. Differential expression and  
475 functional roles of chemokine (C-C motif) ligand 23 and its receptor chemokine (C-C  
476 motif) receptor type 1 in the uterine endometrium during early pregnancy in pigs. *Dev.*  
477 *Comp. Immunol.* (2017). doi:10.1016/j.dci.2017.07.007
- 478 58. Nakayama, T. *et al.* Eotaxin-3/CC Chemokine Ligand 26 Is a Functional Ligand for

- 479 CX3CR1. *J. Immunol.* (2010). doi:10.4049/jimmunol.0904126
- 480 59. Gregg, B., Lumeng, C. N. & Bernal-Mizrachi, E. Fractalkine signaling in regulation of  
481 insulin secretion. *Islets* (2014). doi:10.4161/isl.27861
- 482 60. Jo, S. Y. *et al.* CT perfusion can predict overexpression of CXCL8 (Interleukin-8) in  
483 head and neck squamous cell carcinoma. *Am. J. Neuroradiol.* (2013).  
484 doi:10.3174/ajnr.A3610
- 485 61. Kritharis, A., Al-Samkari, H. & Kuter, D. J. Hereditary hemorrhagic telangiectasia:  
486 Diagnosis and management from the hematologist's perspective. *Haematologica*  
487 (2018). doi:10.3324/haematol.2018.193003
- 488 62. Kochumon, S. *et al.* Adipose tissue expression of CCL19 chemokine is positively  
489 associated with insulin resistance. *Diabetes. Metab. Res. Rev.* (2019).  
490 doi:10.1002/dmrr.3087
- 491 63. Wang, H., Lafdil, F., Kong, X. & Gao, B. Signal transducer and activator of  
492 transcription 3 in liver diseases: A novel therapeutic target. *International Journal of*  
493 *Biological Sciences* (2011). doi:10.7150/ijbs.7.536
- 494 64. Mirando, A. C., Francklyn, C. S. & Lounsbury, K. M. Regulation of angiogenesis by  
495 aminoacyl-trna synthetases. *International Journal of Molecular Sciences* (2014).  
496 doi:10.3390/ijms151223725
- 497 65. Cane, G. *et al.* Up-regulation of intestinal vascular endothelial growth factor by  
498 Afa/Dr diffusely adhering *Escherichia coli*. *PLoS One* (2007).  
499 doi:10.1371/journal.pone.0001359
- 500 66. Liu, N. *et al.* *Helicobacter pylori* promotes angiogenesis depending on  
501 Wnt/beta-catenin-mediated vascular endothelial growth factor via the  
502 cyclooxygenase-2 pathway in gastric cancer. *BMC Cancer* (2016).  
503 doi:10.1186/s12885-016-2351-9
- 504

505 **Acknowledgments:** The authors are thankful to the Science and Engineering Research  
506 Board, Govt. of India (PDF/2016/001448), for financial support. The authors thank Prof. VR.  
507 Muthukkaruppan for the helpful discussion.

508 **Author Contributions:** Conceptualization, U.S., methodology, U.S., writing—original  
509 draft preparation, U.S., Investigation, B.D., writing—review and editing, B.D., supervision,  
510 B.D.

511 **Disclosure:** The authors declare no conflict of interest.

512 **Table(s)**

513 **Table 1.** List of dysregulated pathways enriched in retinal angiogenic disease samples  
514 compared to normal control samples.

| <b>Dysregulated pathway</b>                                | <b>Normalized enrichment score</b> | <b>p value</b> |
|------------------------------------------------------------|------------------------------------|----------------|
| Neuroactive ligand receptor interaction                    | 3.101                              | 0.000          |
| Cytokine cytokine receptor interaction                     | 2.553                              | 0.000          |
| Arachidonic acid metabolism                                | 1.931                              | 0.007          |
| Aminoacyl tRNA biosynthesis                                | -1.572                             | 0.042          |
| Tight junction                                             | -1.631                             | 0.042          |
| Pathogenic Escherichia coli infection                      | -1.646                             | 0.032          |
| Cysteine and methionine metabolism                         | -1.667                             | 0.035          |
| Vibrio cholerae infection                                  | -1.753                             | 0.018          |
| Endocytosis                                                | -1.768                             | 0.014          |
| Regulation of actin cytoskeleton                           | -1.872                             | 0.012          |
| Epithelial cell signaling in helicobacter pylori infection | -1.873                             | 0.016          |
| Arrhythmogenic right ventricular cardiomyopathy            | -1.886                             | 0.011          |
| p53 signaling pathway                                      | -1.892                             | 0.008          |
| Protein export                                             | -1.909                             | 0.004          |
| Lysosome                                                   | -1.925                             | 0.004          |
| Adherens junction                                          | -2.040                             | 0.002          |
| Spliceosome                                                | -2.094                             | 0.004          |
| Alzheimers disease                                         | -2.108                             | 0.000          |
| Parkinsons disease                                         | -2.324                             | 0.002          |

|                           |        |       |
|---------------------------|--------|-------|
| Huntingtons disease       | -2.494 | 0.000 |
| Oxidative phosphorylation | -2.579 | 0.000 |
| Ribosome                  | -4.047 | 0.000 |

---

# Figures

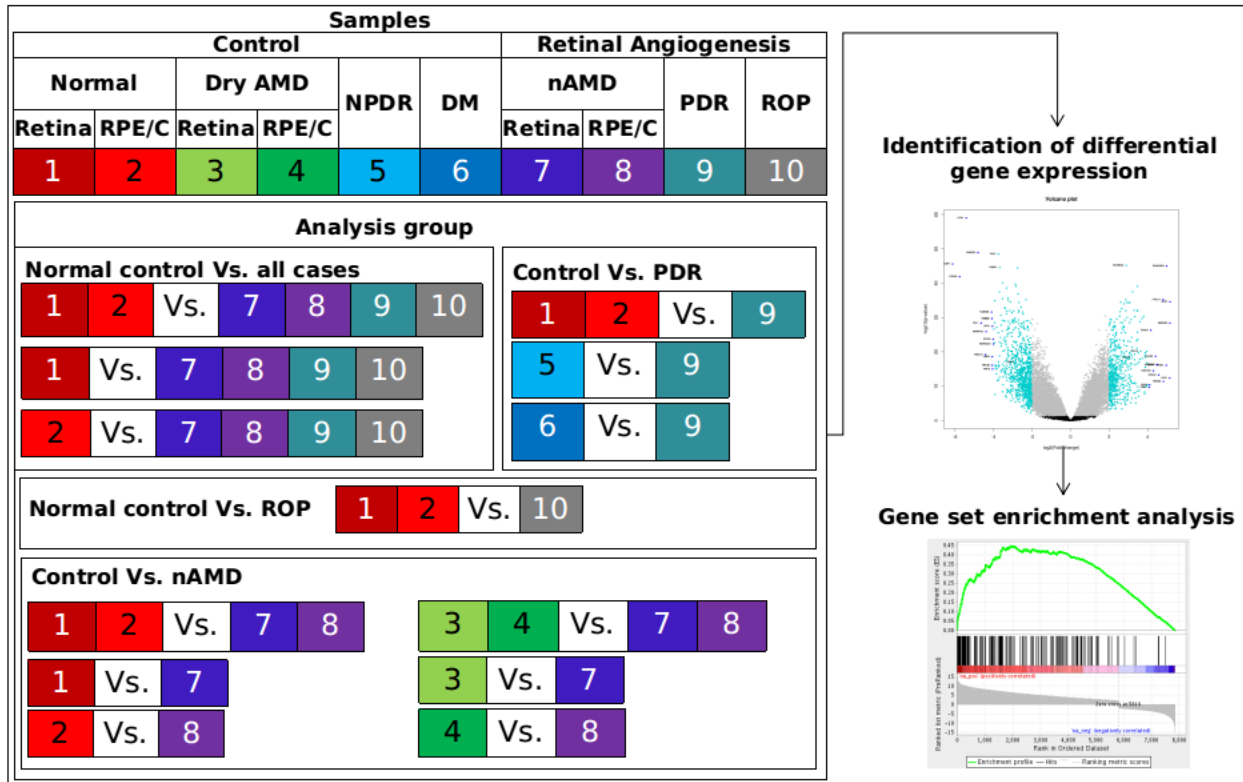

**Figure 1.** Schema of the workflow - samples, analysis groups used, and the methods followed

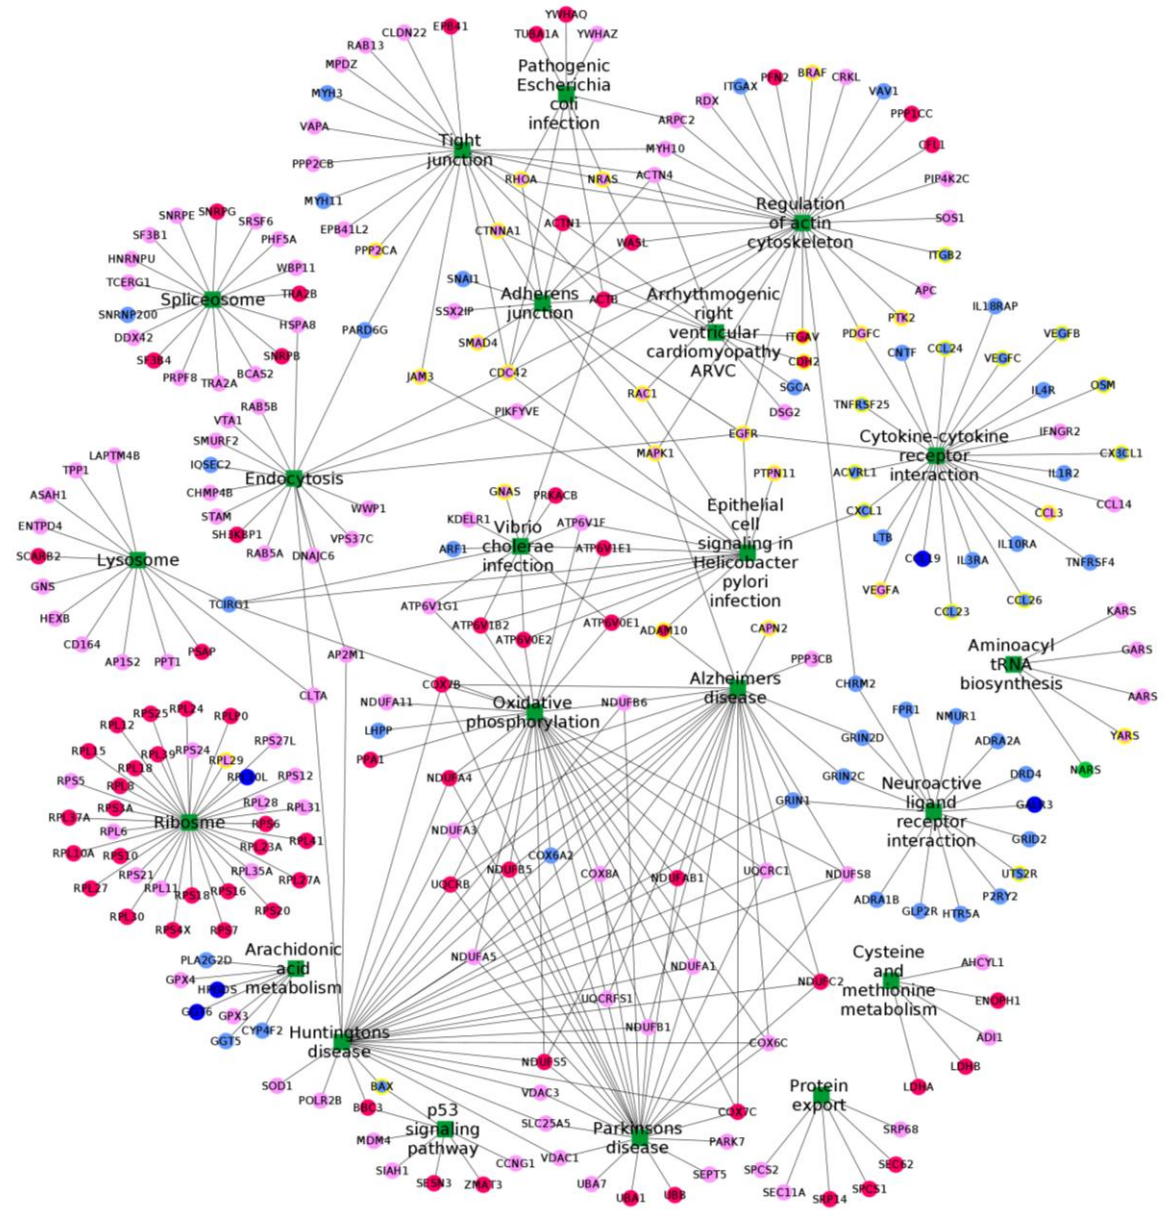

**Figure 2.** Dysregulated pathway interaction network for the differentially expressed genes (DEGs). The green node represents the dysregulated pathways, pink represents DEGs with fold change between -3 and -2, red represents  $FC \leq -3$ , pale blue represents FC between 2 and 3, dark blue represents  $FC \geq 3$ . The round edged square shape of node represents pathways, circle represents DEGs, and yellow circle represents DEGs associated with angiogenesis GO.



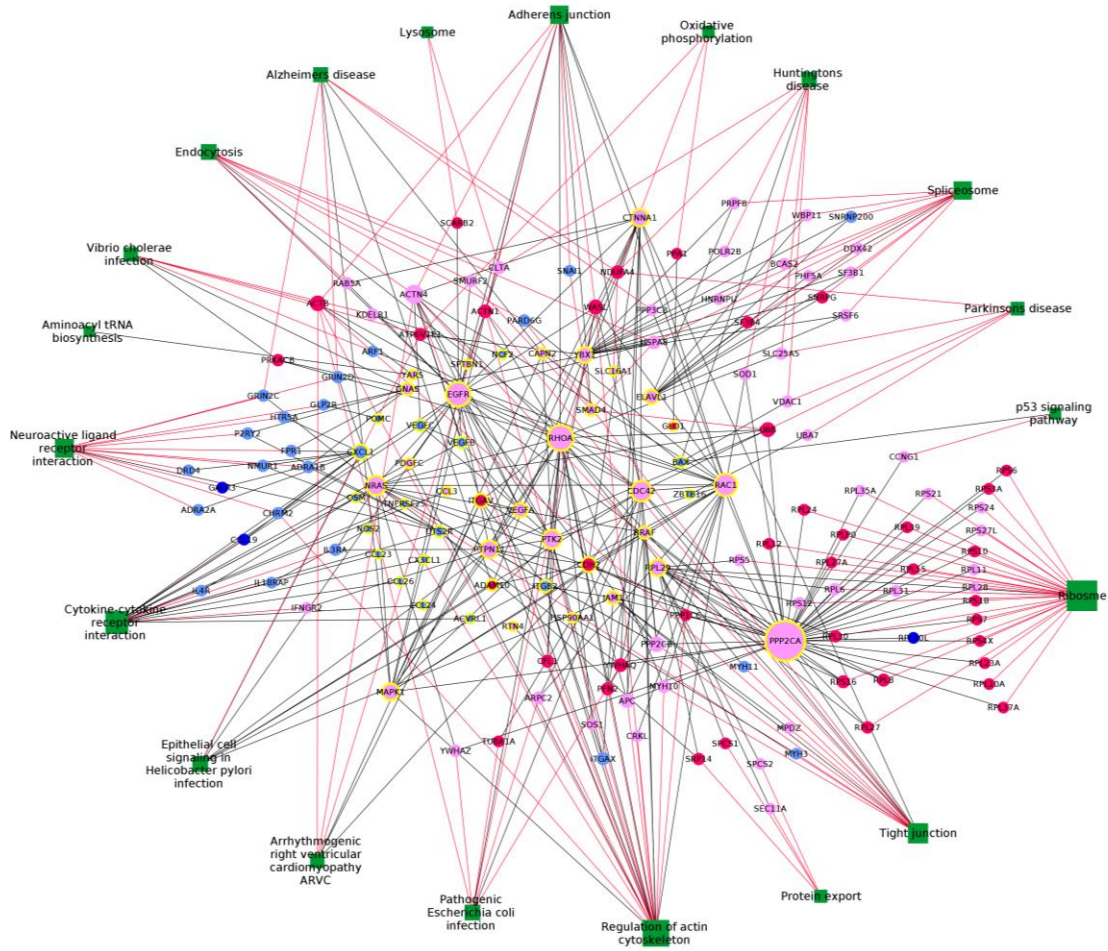

**Figure 3.** PPI network of core angiogenesis GO related differentially expressed genes and their PPI partners with the interaction of dysregulated pathways. The green node represents the dysregulated pathways, pink represents DEGs with fold change between -3 and -2, red represents  $FC \leq -3$ , pale blue represents FC between 2 and 3, dark blue represents  $FC \geq 3$ . The square shape of node represents pathways, circle represents DEGs, and yellow circle represents DEGs associated with angiogenesis GO. Edges red in colour represents the interaction between the pathway and the PPI partners of the DEGs which associated with angiogenesis. The size of the node corresponds to the degree i.e. number of edges linked to that node.

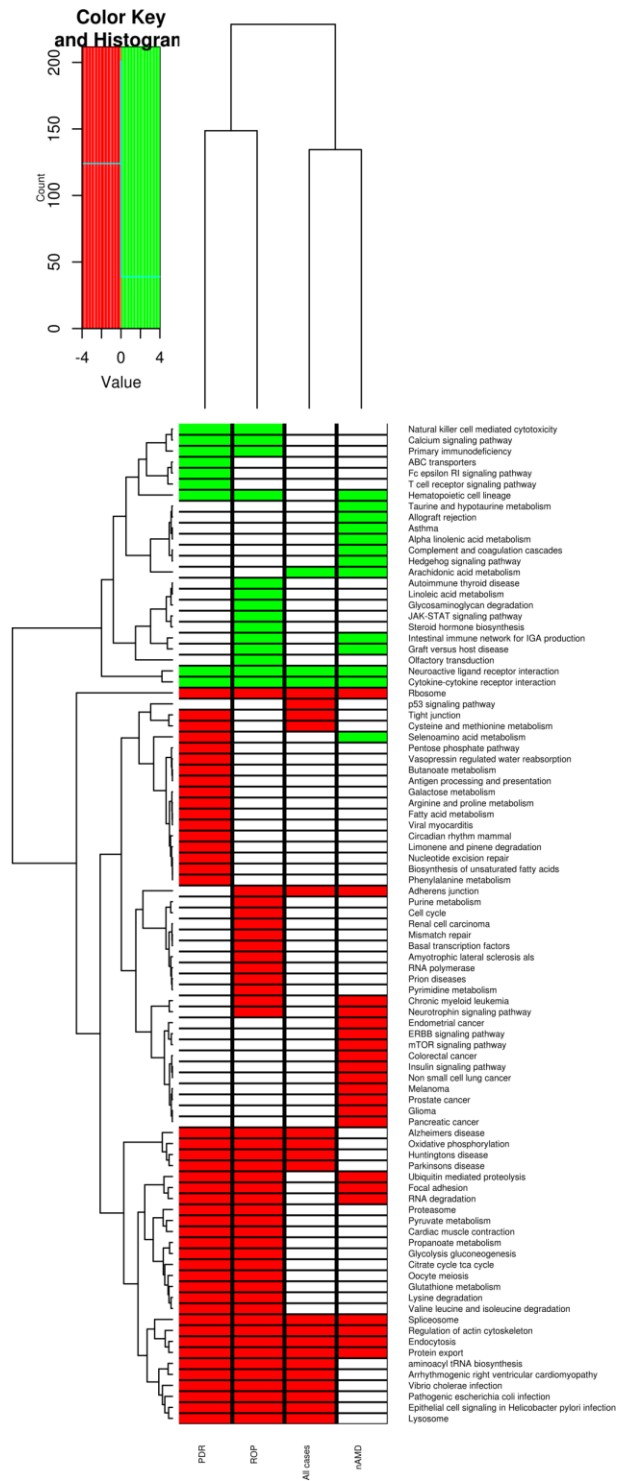

**Figure 4.** Clustering annotation with heat map of dysregulated pathways in retinal angiogenesis related diseases

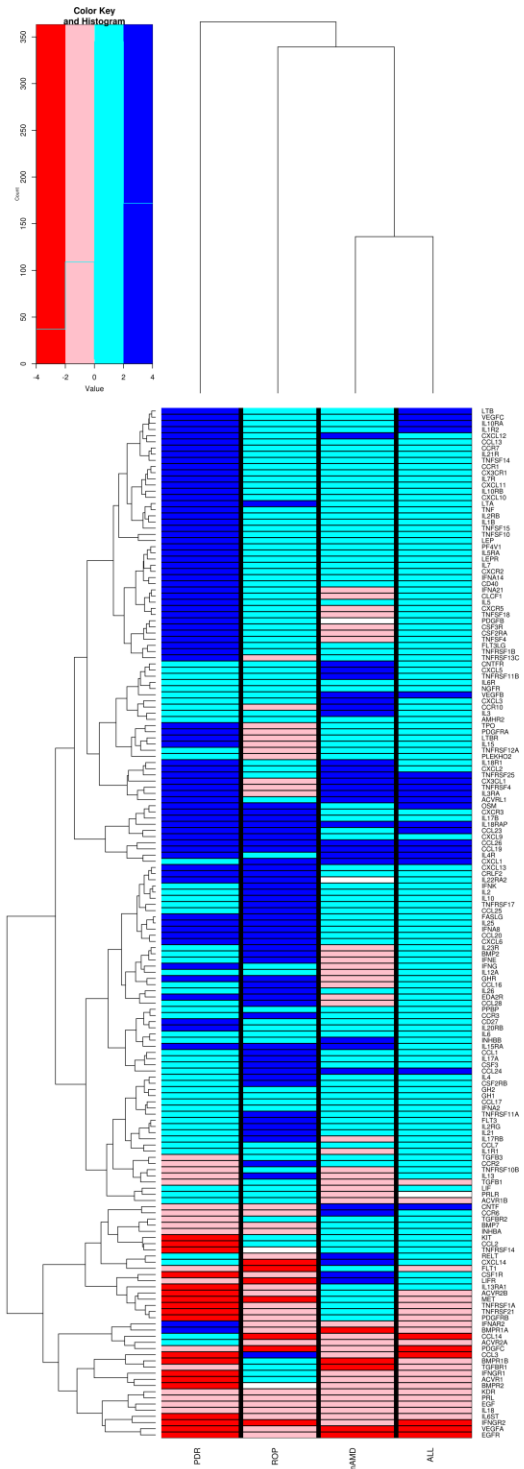

**Figure 5.** Heat map of DEGs in cytokine-cytokine receptor interaction pathway in retinal angiogenic related diseases

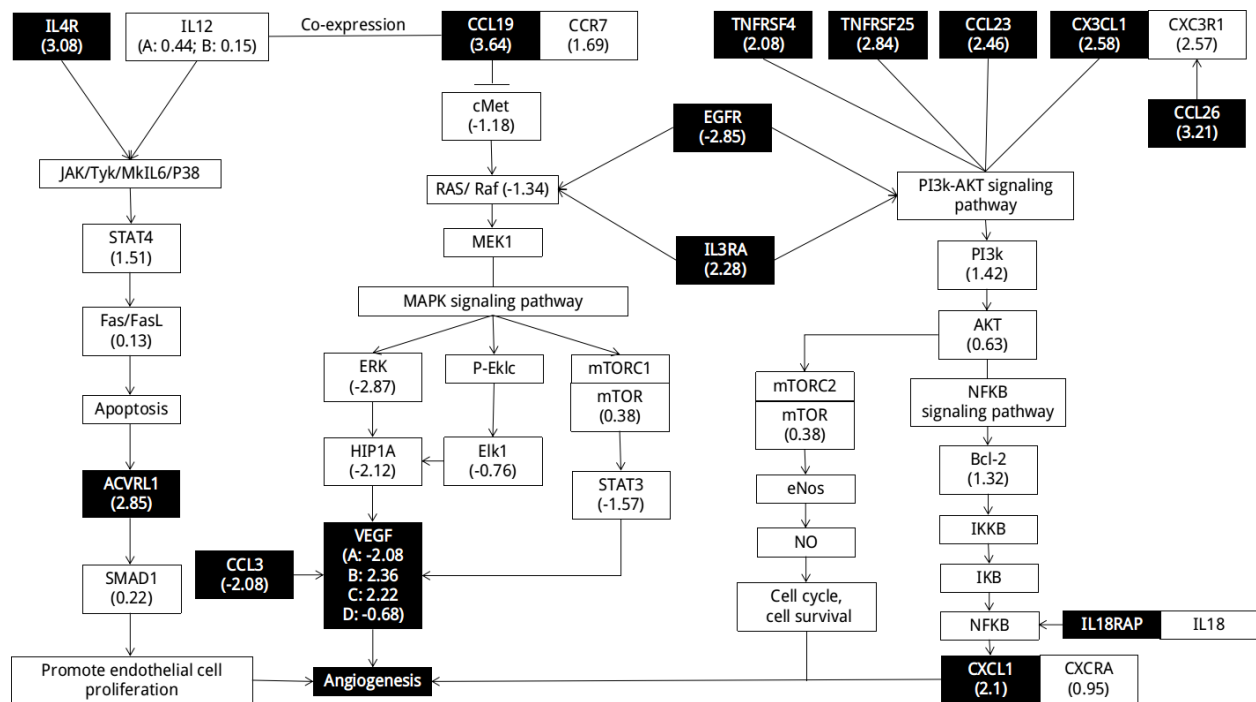

**Figure 6.** Regulatory role of DEGs in cytokine-cytokine receptor interaction pathway. Dark boxes indicate the DEGs identified in the retinal angiogenesis samples used in this study.
